# Supplementary material for: Theoretical studies on the structures and properties of doped graphenes with and without an external electrical field
Source: Royal Society of Chemistry journal article supplement (doi:10.1039/c9ra00326f), 2019-01-01
Supplement: c9ra00326f1.pdf [file c9ra00326f1.pdf]

1     **Theoretical studies on the structures and properties of doped graphenes**  
2                     **with and without the external electrical field**

3     Yuhua Wang<sup>a\*</sup>, Weihua Wang<sup>b</sup>, Shuyun Zhu<sup>b</sup>, Ge Yang<sup>c\*</sup>, Zhiqiang Zhang<sup>d</sup>, Ping Li<sup>b\*</sup>

4     <sup>a</sup> Administrative office of Laboratory and Equipment, Qufu Normal University, 273165, Qufu,  
5     Shandong, PR China

6     <sup>b</sup> College of Chemistry and Chemical Engineering, Qufu Normal University, 273165, Qufu,  
7     Shandong, PR China

8     <sup>c</sup> The School of Life Sciences, Qufu Normal University, 273165, Qufu, Shandong, PR China

9     <sup>d</sup> Department of Material and Chemical Engineering, Zhengzhou University of Light Industry,  
10    Zhengzhou 450002, Henan, PR China

11

12                     E-mails: [hxlwe@126.com](mailto:hxlwe@126.com) (Y. Wang); [lpsdu@sdu.edu.cn](mailto:lpsdu@sdu.edu.cn) (P. Li)

13

14

15

16

17

18

19

20

21

22

23

24

25

26

27

28

29

30

31

32

33

34

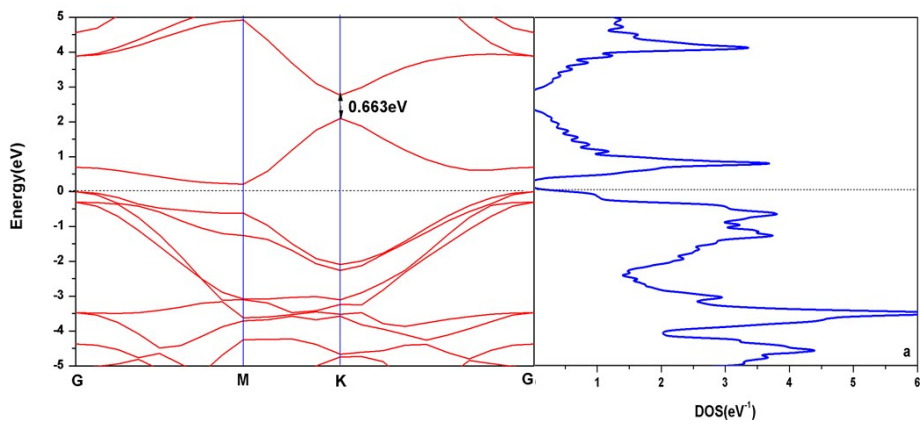

35

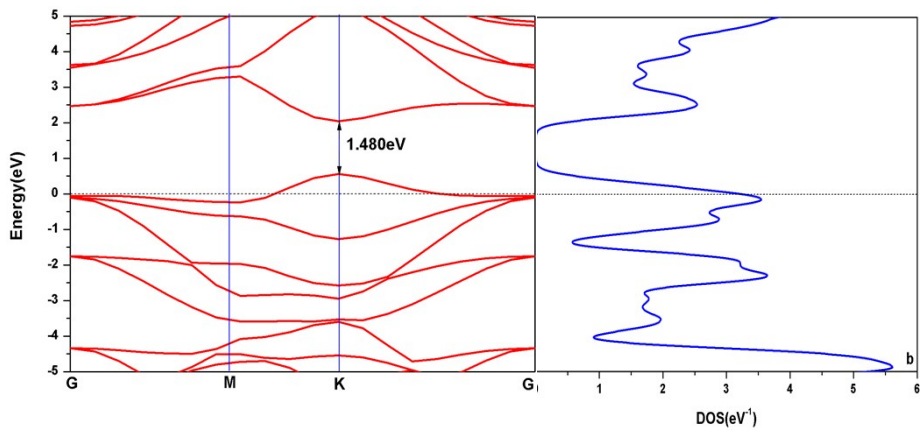

36

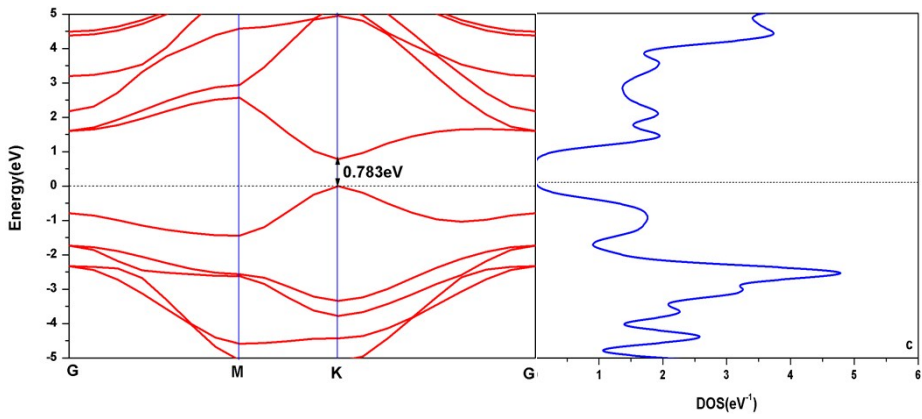

37

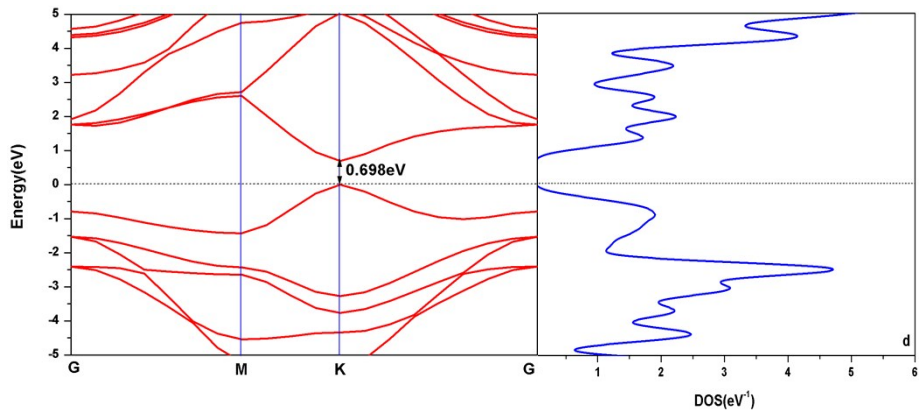

38

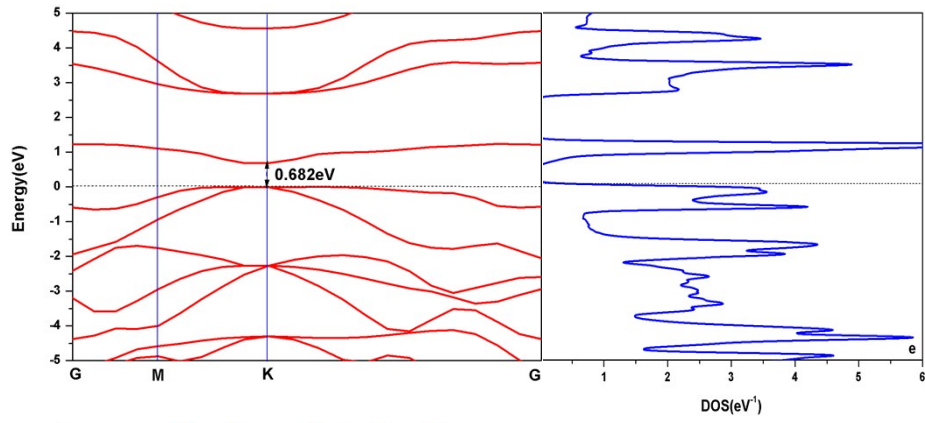

39

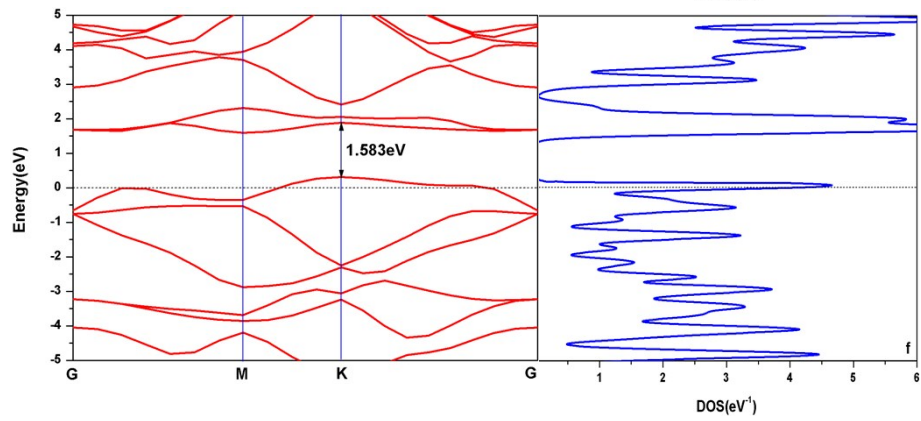

40

41 **Fig. S1.** The band gaps (left) and DOS (right) of doped graphenes: B-G(a), Al-G(b), Si-G(c),  
 42 Ge-G(d), As-G(e), and Sb-G(f).

43

44

45

46

47

48

49

50

51

52

53

54

55

56

57

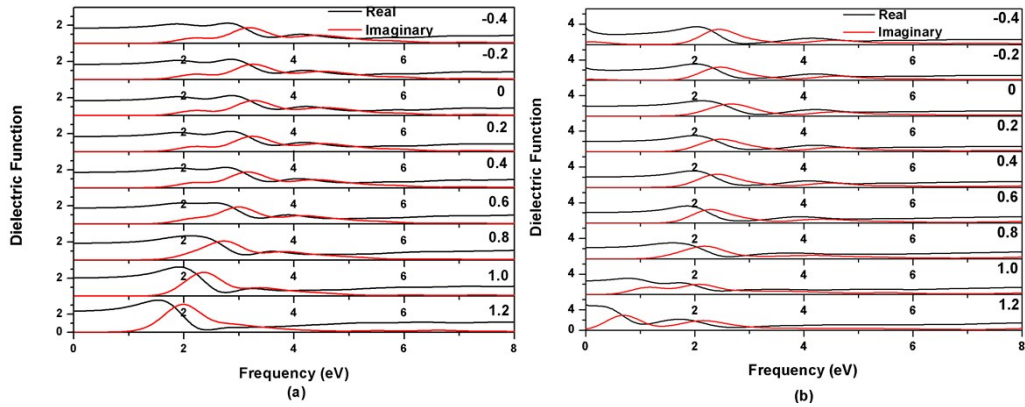

58

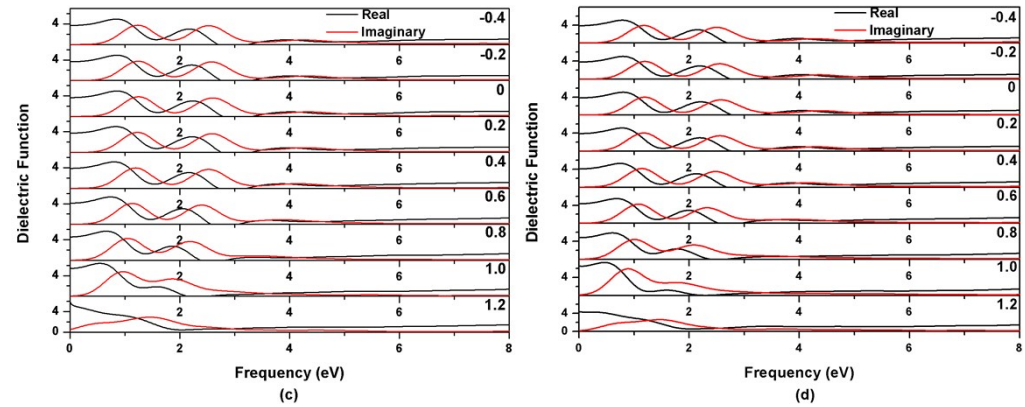

59

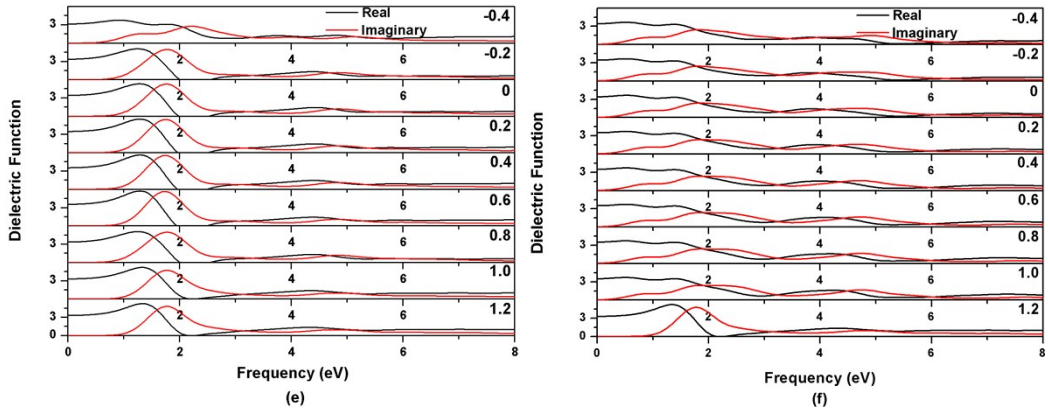

60

61 **Fig. S2.** Dielectric functions of B-G(a), Al-G(b), Si-G(c), Ge-G(d), As-G(e), and Sb-G(f)  
 62 under different  $E_f$  ranging from -0.4 to 1.2 eV/Å.

63

64

65

66

67

68

69

70

71

72

73

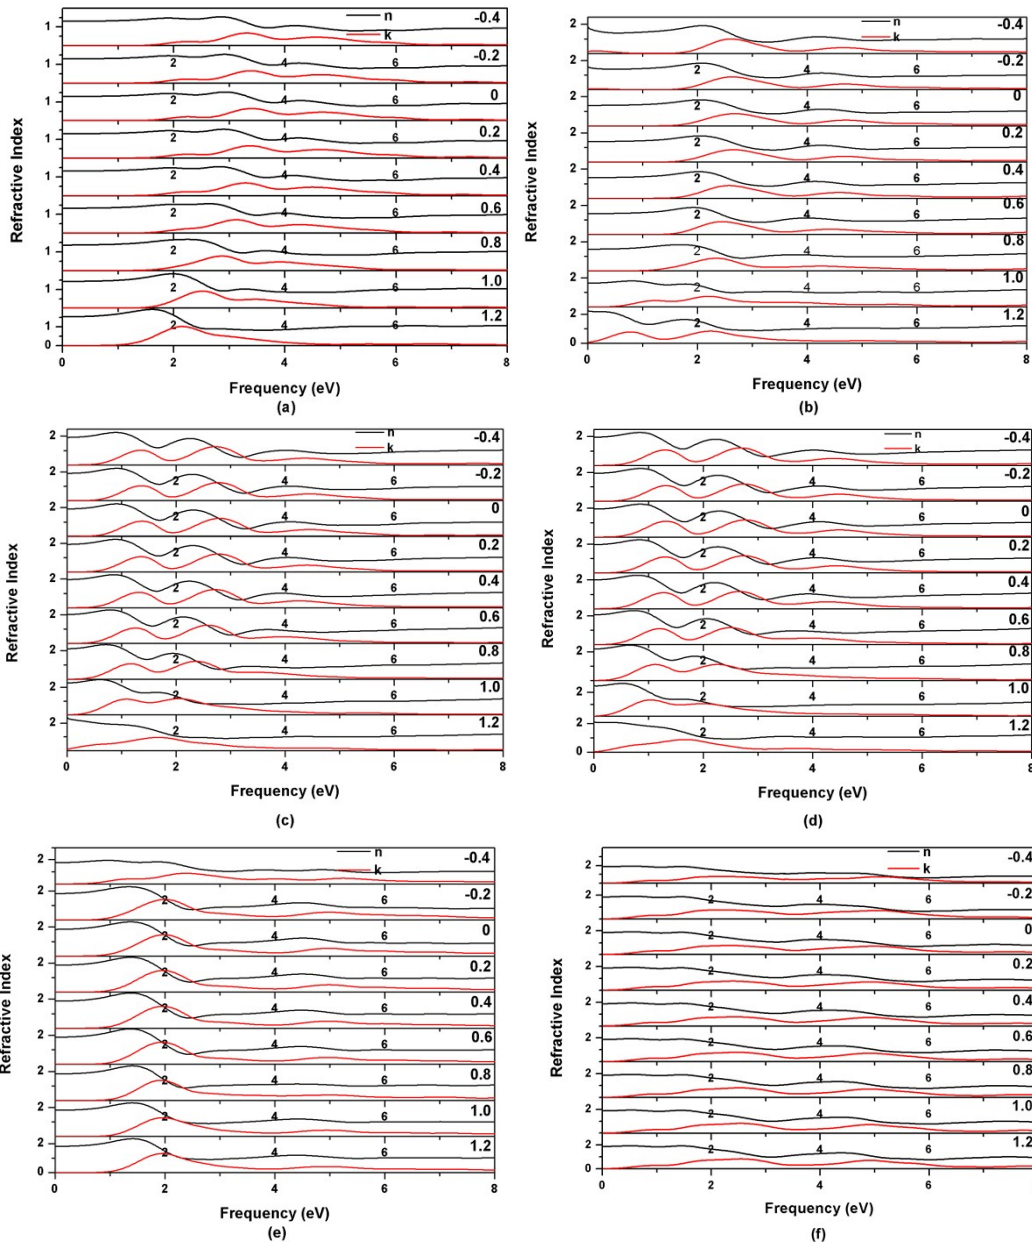

74

75

76

77 **Fig. S3.** Refractive indexes of B-G(a), Al-G(b), Si-G(c), Ge-G(d), As-G(e), and Sb-G(f) under  
 78 different  $E_f$  ranging from -0.4 to 1.2 eV/Å.

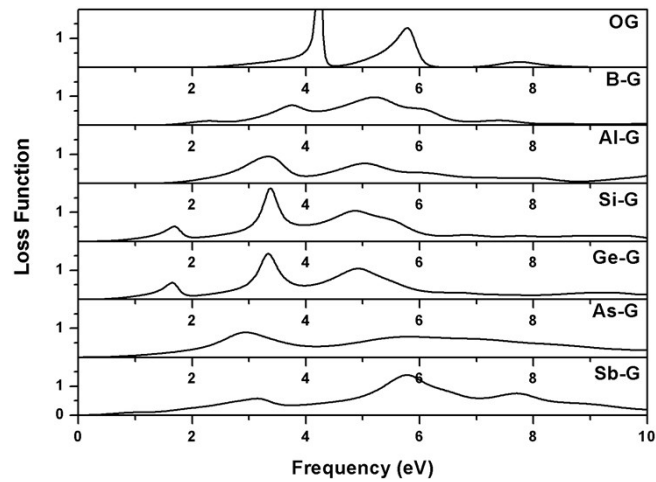

79

80

**Fig. S4.** Loss functions of OG, B-G, Al-G, Si-G, Ge-G, As-G, and Sb-G.

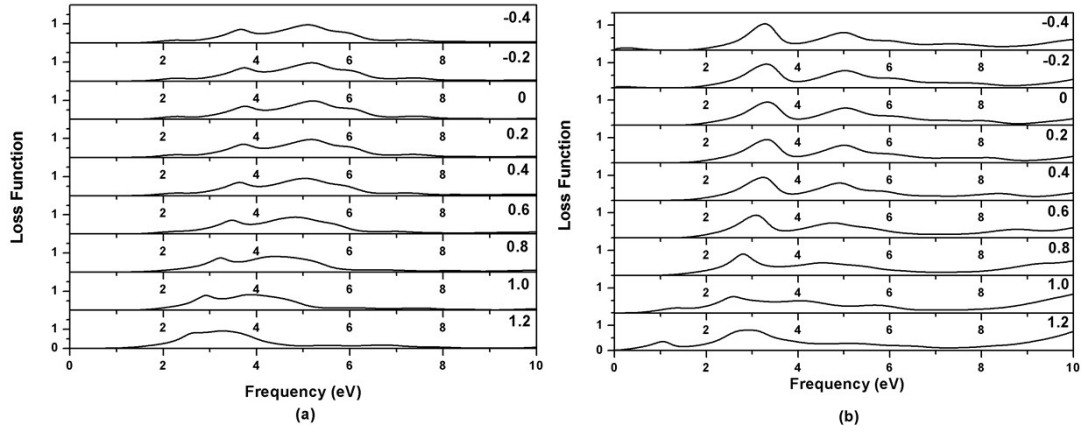

81

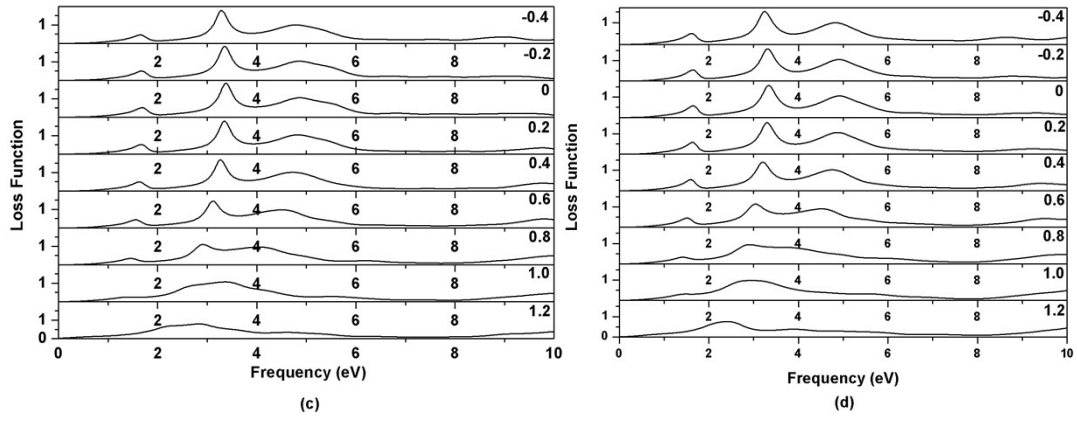

82

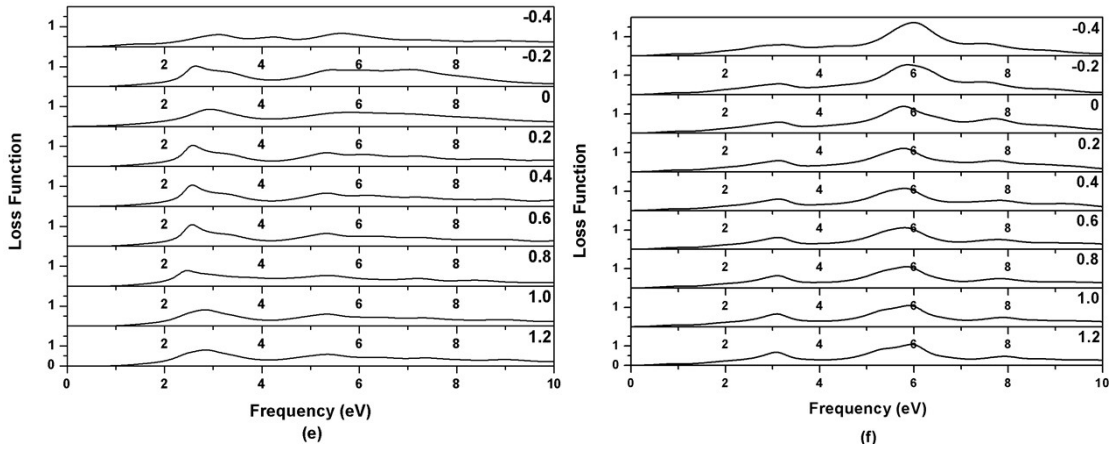

83

84 **Fig. S5.** Loss functions of B-G(a), Al-G(b), Si-G(c), Ge-G(d), As-G(e), and Sb-G(f) under  
 85 different  $E_f$  ranging from -0.4 to 1.2 eV/Å.

86

87

88

89

90

91
